# Supplementary material
Source: MDPI journal article supplement (https://www.mdpi.com/2077-0472/13/8/1618)
Supplement: s1 [file s1]

Table S1. Geographic coordinates of population of the mother plant population of Dragon's blood (*Croton lechleri* Müll Arg.). UTM: Universal Transverse Mercator. 1: mother plant population established in natural environment area; 2: mother plant population established in cultivated environment area

| Mother plant population | Geographical coordinates (UTM) |
|-------------------------|--------------------------------|
| 1                       | -10.012357; -67.842624         |
| 2                       | -9.957514; -67.874764          |
